# Supplementary material for: MWCNT/perylene bisimide water dispersions for miniaturized temperature sensors
Source: Royal Society of Chemistry journal article supplement (doi:10.1039/c5ra11544b), 2015-01-01
Supplement: c5ra11544b1.pdf [file c5ra11544b1.pdf]

**Supplementary information** of the manuscript entitled “*MWCNT/Perylene bisimide Water Dispersions for Miniaturized Temperature Sensors*” by Tarita Biver,<sup>a,b</sup> Francesco Criscitiello,<sup>a</sup> Fabio Di Francesco,<sup>a</sup> Matteo Minichino,<sup>a</sup> Timothy Swager,<sup>c</sup> Andrea Pucci,<sup>a,b</sup>

<sup>a</sup> Dipartimento di Chimica e Chimica Industriale, Università di Pisa, Via Moruzzi 13, 56124 Pisa, Italy

<sup>b</sup> INSTM, Unità di Ricerca di Pisa, Via Moruzzi 13, 56126 Pisa, Italy

<sup>c</sup> Department of Chemistry and Institute for Soldier Nanotechnologies, Massachusetts Institute of Technology, 77 Massachusetts Avenue, Cambridge, MA 02139, USA

Corresponding author: Dr. Andrea Pucci, Dipartimento di Chimica e Chimica Industriale, Università di Pisa, Via Moruzzi 13, 56124 Pisa, Italy. Tel.: +39 050 2219 270. E-mail address: andrea.pucci@unipi.it

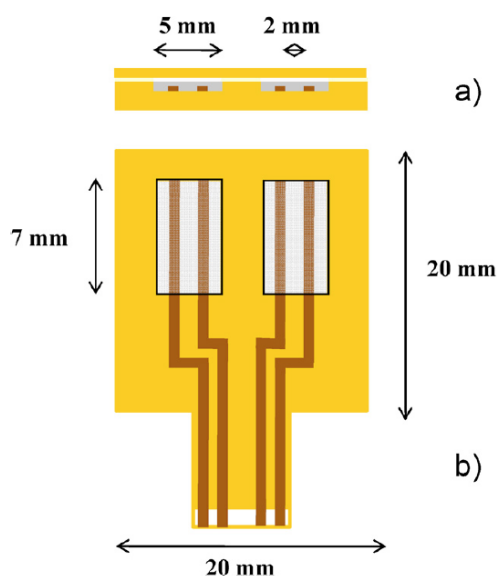

**Figure S1.** Schematic diagram of the sensor: (a) section and (b) top view

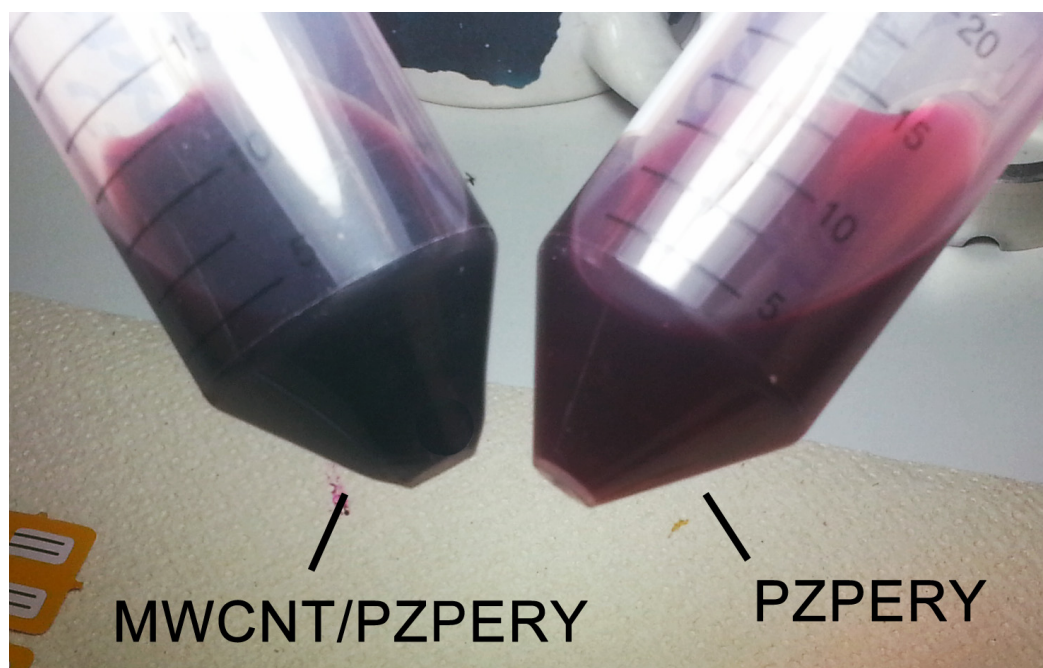

**Figure S2.** Picture of and MWCNT/PZPERY water dispersion (left, PZPERY concentration = 1 mg/mL; MWCNT concentration = 0.0165 mg/mL) and PZPERY water solution (right, PZPERY concentration = 1 mg/mL)

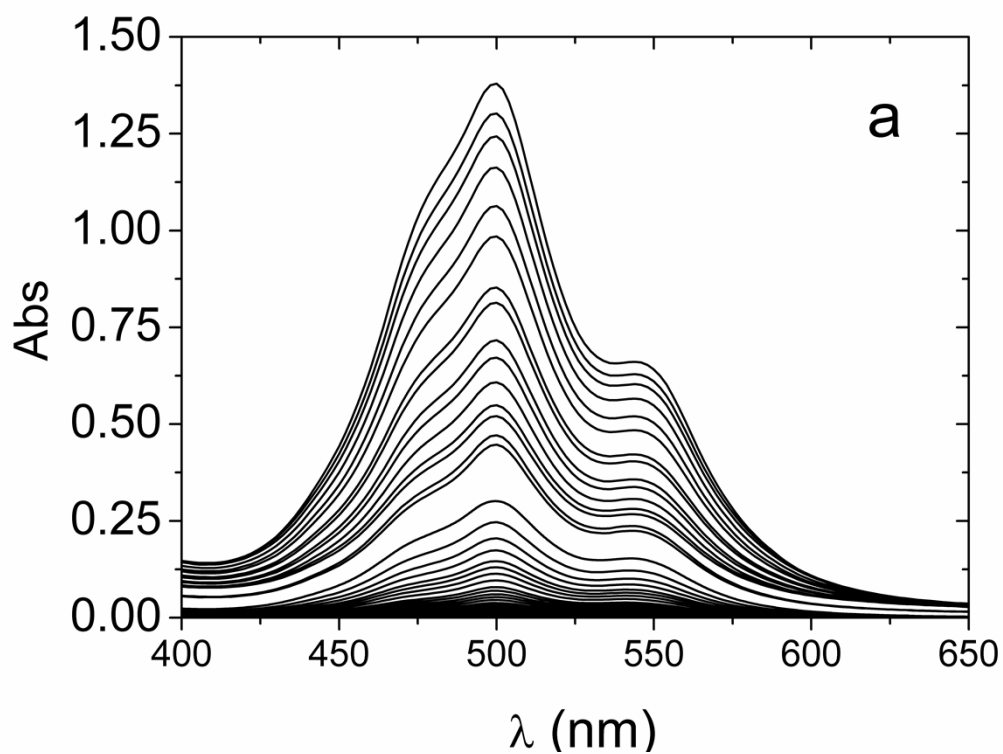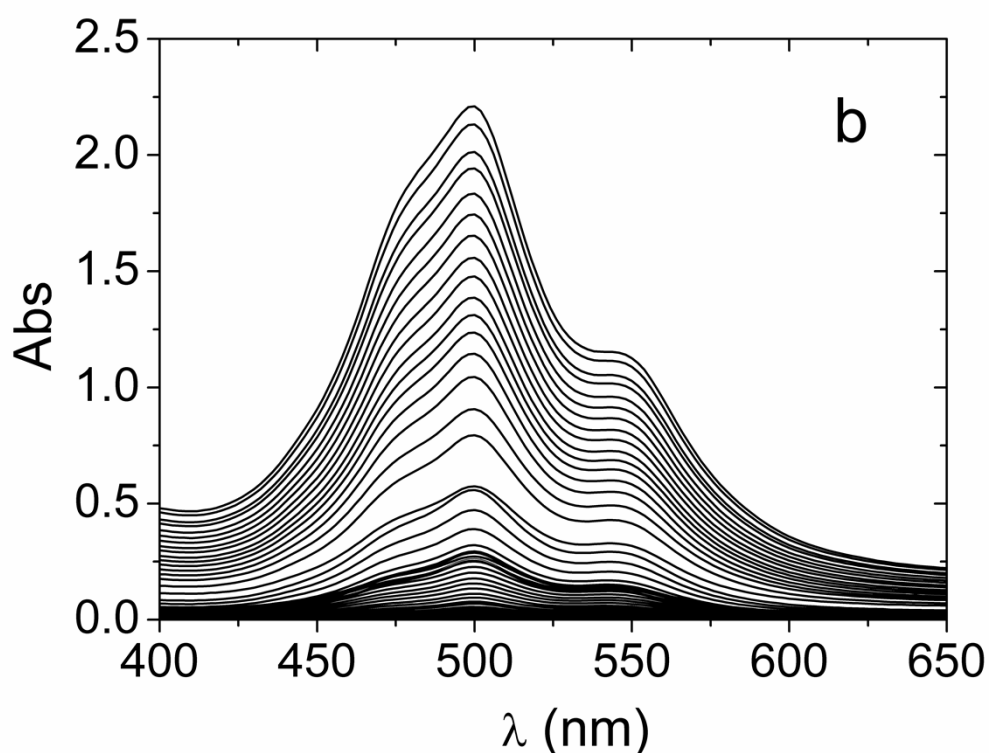

**Figure S3.** (a) UV-vis spectra in water of increasing concentrations of PZPERY ( $C_{\text{pery}}$  from 0 to 0.6 mg/mL) and (b) of increasing concentrations of the PZPERY/MWCNT dispersion ( $C_{\text{pery}}$  from 0 to 0.6 mg/mL,  $C_{\text{MWCNT}} \approx C_{\text{pery}}/61$ ).

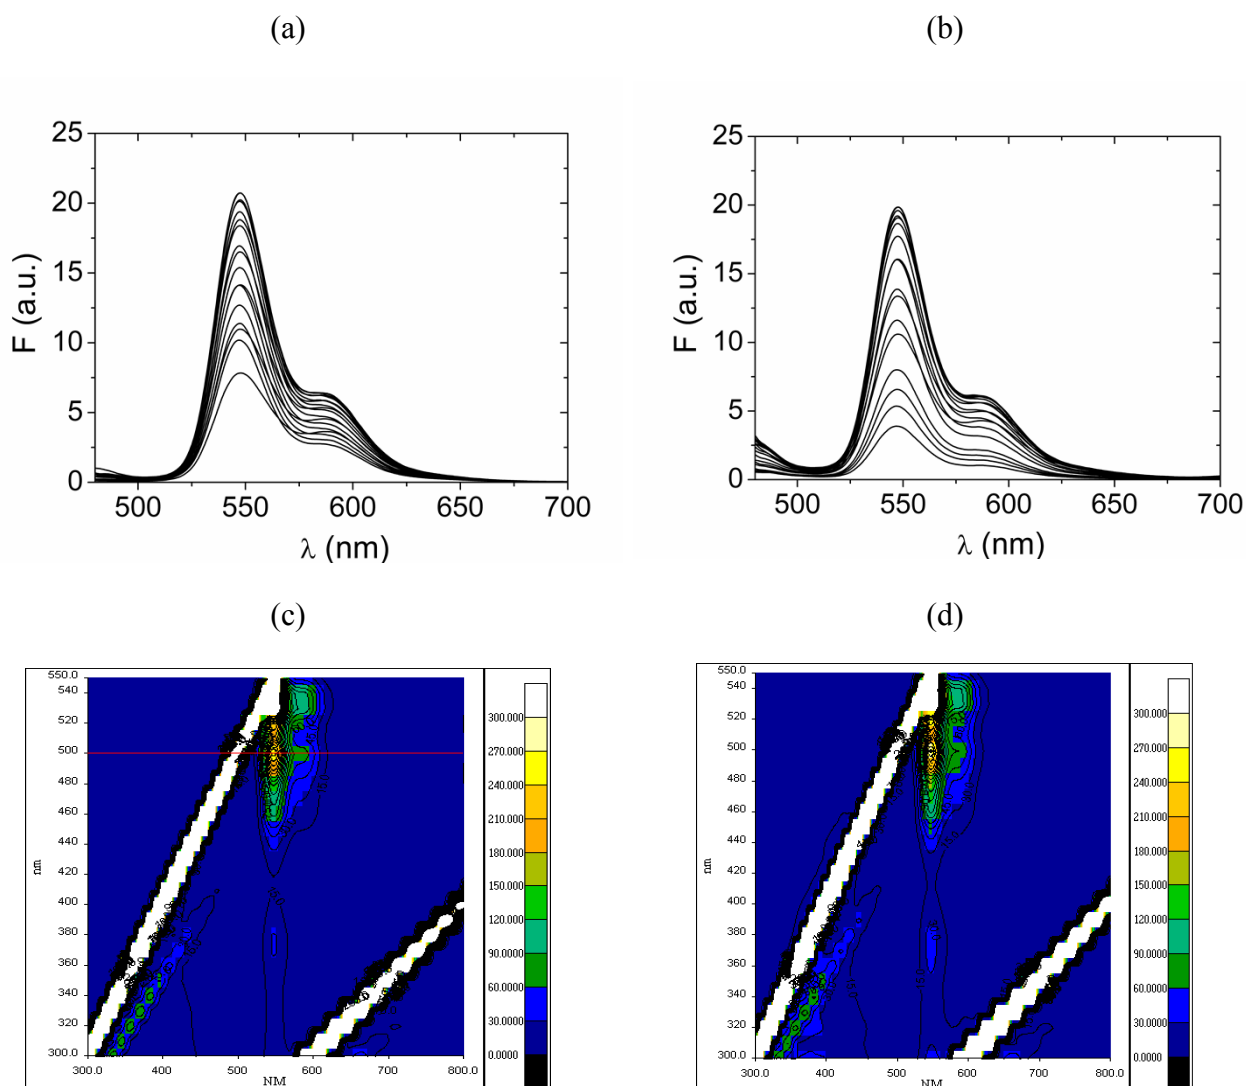

**Figure S4.** (a) Fluorescence spectra in water of increasing concentrations of PZPERY alone ( $C_{\text{perY}}$  from  $1.6 \times 10^{-4}$  to 0.09 mg/mL,  $\lambda_{\text{ex}} = 460$  nm) and (b) of increasing concentrations of the PZPERY/MWCNT dispersion ( $C_{\text{perY}}$  from  $1.6 \times 10^{-4}$  to 0.09 mg/mL,  $C_{\text{MWCNT}} \approx C_{\text{perY}}/61$ ,  $\lambda_{\text{ex}} = 460$  nm). (c) 3D spectra of the fluorescent features of perylene dye alone ( $C_{\text{perY}} = 1.0$  mg/mL) and (d) of increasing concentrations of the PZPERY/MWCNT dispersion ( $C_{\text{perY}} = 1.0$  mg/mL); x-axis is the emission wavelength, y-axis is the excitation wavelength, intense diagonal signal are due to non-chemical scattering effects.
